# Supplementary material for: Evaluation of the Environmental DNA Method for Estimating Distribution and Biomass of Submerged Aquatic Plants
Source: PLoS One. 2016 Jun 15;11(6):e0156217. doi: 10.1371/journal.pone.0156217 (PMC4909283; doi:10.1371/journal.pone.0156217)
Supplement: S1 Table — (XLS) [file pone.0156217.s003.xls]

## Sheet: Sheet1
ITEM TO CHECK	IMPORTANCE	CHECKLIST
EXPERIMENTAL DESIGN
Definition of experimental and control groups	E	Control: An aquarium without fish; Experimental: aquariums with fish
Number within each group	E	Control: n=1, Experimental: n=4 and 6
Assay carried out by core lab or investigator's lab?	D	Investigator's Lab
Acknowledgement of authors' contributions	D	Yes
SAMPLE
Description	E	Field survey: water from 21 ponds, Aquarium exp.: water from 48 aquariums
Volume/mass of sample processed	D	Field survey: 1L, Aquarium exp.: 15 mL
Microdissection or macrodissection	E	N/A
Processing procedure	E	Field survey:We collected a 1-L water sample for eDNA analysis from the surface of 21 ponds on the shore from 11th June to 14th October 2014.Each water sample was ﬁltered using two GF/F glass ﬁlters (mesh size: ~0.7 μm, GE Healthcare Japan, Tokyo, Japan) within 6 hours after sampling to capture eDNA.The filters were stored at –20 °C until DNA extraction. The captured DNA was collected from each f…
If frozen - how and how quickly?	E	N/A
If fixed - with what, how quickly?	E	N/A
Sample storage conditions and duration (especially for FFPE samples)	E	All concentrated samples were stored in 1.5-mL microtubes at –20°C.
NUCLEIC ACID EXTRACTION
Procedure and/or instrumentation	E	We used DNeasy blood and tissue kit (Qiagen, Hilden, Germany).
Name of kit and details of any modifications	E	We used DNeasy blood and tissue kit following the manufacturer's instructions.
Source of additional reagents used	D	N/A
Details of DNase or RNAse treatment	E	N/A
Contamination assessment (DNA or RNA)	E	Not Checked
Nucleic acid quantification	E	Quantification was performed using a Q5000 spectrophotometer (Tomy Degital Biology Co. Ltd., Tokyo, Japan) following the manufacturer's instructions.
Instrument and method	E
Purity (A260/A280)	D
Yield	D
RNA integrity method/instrument	E	N/A
RIN/RQI or Cq of 3' and 5' transcripts	E	N/A
Electrophoresis traces	D	N/A
Inhibition testing (Cq dilutions, spike or other)	E	Not Checked
REVERSE TRANSCRIPTION
Complete reaction conditions	E	N/A
Amount of RNA and reaction volume	E	N/A
Priming oligonucleotide (if using GSP) and concentration	E	N/A
Reverse transcriptase and concentration	E	N/A
Temperature and time	E	N/A
Manufacturer of reagents and catalogue numbers	D	N/A
Cqs with and without RT	D*	N/A
Storage conditions of cDNA	D	N/A
qPCR TARGET INFORMATION
If multiplex, efficiency and LOD of each assay.	E	N/A
Sequence accession number	E	AB002571
Location of amplicon	D	1018...1127 of AB002571
Amplicon length	E	110bp
In silico specificity screen (BLAST, etc)	E	The in silico specificity screen was performed using BLAST.
Pseudogenes, retropseudogenes or other homologs?	D	N/A
Sequence alignment	D	N/A
Secondary structure analysis of amplicon	D	Not Checked
Location of each primer by exon or intron (if applicable)	E	N/A
What splice variants are targeted?	E	N/A
qPCR OLIGONUCLEOTIDES
Primer sequences	E	Hydrilla verticillata: F (5’- TTTGCGCGAATATGTAGAACTTGT-3’); R (5’- GCCAAGGTTTTAGCACAGGAAA-3’) Egeria densa: F (5’-CATTTCTCCTTCATTGTATTCTTTCACA-3’); R (5’-ATTTCTATCTGTATCGTAGCCACCAA-3’)
RTPrimerDB Identification Number	D	Not Submitted
Probe sequences	D**	Hydrilla verticillata: 5’- FAM-ATTATTGTAGTGGATCTTCA–MGB -3’ Egeria densa: 5’-FAM-CGGGTCCGAACAGAAATGCTTCTCTCT-TAMRA-3’
Location and identity of any modifications	E
Manufacturer of oligonucleotides	D	Applied Biosystems
Purification method	D	N/A
qPCR PROTOCOL
Complete reaction conditions	E	Reactions were set up manually in a designated room using designated equipment.
Reaction volume and amount of cDNA/DNA	E	Reaction volume is 20 μL, and amount of DNA is 3 μL
Primer, (probe), Mg++ and dNTP concentrations	E	Each TaqMan reaction contained 900 nM primer and 125 nM TaqMan probe in 1× PCR master mix (TaqMan environmental master mix; Applied Biosystems)
Polymerase identity and concentration	E	We used TaqMan Environmental master mix following the manufacturer's instructions.
Buffer/kit identity and manufacturer	E	We used TaqMan Environmental master mix following the manufacturer's instructions.
Exact chemical constitution of the buffer	D	N/A
Additives (SYBR Green I, DMSO, etc.)	E	N/A
Manufacturer of plates/tubes and catalog number	D	Microamp Fast 96 Well Reaction Plate (4346907 ) & Microamp Optical Adhesive Film (4311971)(Applied Biosystems)
Complete thermocycling parameters	E	10 min at 95°C, and 55 cycles of 15 s at 95°C and 60 s at 58°C.
Reaction setup (manual/robotic)	D	We performed following the manufacturer's instructions.
Manufacturer of qPCR instrument	E	StepOne-Plus™ Real-Time PCR system (Applied Biosystems, Foster City, CA, USA)
qPCR VALIDATION
Evidence of optimisation (from gradients)	D	Not Performed
Specificity (gel, sequence, melt, or digest)	E	The specificity of the primer-probe was tested by direct qPCR-amplicon sequence.
For SYBR Green I, Cq of the NTC	E	N/A
Standard curves with slope and y-intercept	E	Field survey:slope:−3.37, y-intercept: 41.003 Aquarium exp.:H.verticillata slope:(-3.18)-(-3.51), y-intercept:36.91-41.81, E.densa slope:(-3.15)-(-3.54), y-intercept:37.85-40.55
PCR efficiency calculated from slope	E	Field survey:99.4% Aquarium exp.:H.verticillata:92.8 - 106.4 % E.densa: 91.5 - 107.6%
Confidence interval for PCR efficiency or standard error	D	Standard error: H.verticillata: 1.58, E.densa: 2.47
r2 of standard curve	E	Field survey:0.992 Aquarium exp.:H.verticillata: 0.984 - 0.995 E.densa: 0.988 - 0.995
Linear dynamic range	E	3-30000
Cq variation at lower limit	E	The positive signals were detected from the one of three wells.
Confidence intervals throughout range	D	Not Checked
Evidence for limit of detection	E	Three copies of the DNA were always detected.
If multiplex, efficiency and LOD of each assay.	E	N/A
DATA ANALYSIS
qPCR analysis program (source, version)	E	StepOne Software ver 2.0
Cq method determination	E	We performed according to default setting of Software above.
Outlier identification and disposition	E	We performed according to default setting of Software above.
Results of NTCs	E	The wells of no-template negative control showed no amplification.
Justification of number and choice of reference genes	E	N/A
Description of normalisation method	E	We used standard curve method
Number and concordance of biological replicates	D	N/A
Number and stage (RT or qPCR) of technical replicates	E	RT: 8 replicates, qPCR: triplicate
Repeatability (intra-assay variation)	E	H.verticillata:0.106<SD<0.765 E.densa: 0.106<SD<0.441 (caluculated using data of 30 copies DNA)
Reproducibility (inter-assay variation, %CV)	D	H.verticillata:3.8%CV E.densa: 3.2%CV (caluculated using data of 30 copies DNA)
Power analysis	D	N/A
Statistical methods for result significance	E	We performed according to default setting of Software above.
Software (source, version)	E	StepOne Software ver 2.0
Cq or raw data submission using RDML	D	Not Submitted
Table 1. MIQE checklist for authors, reviewers and editors. All essential information (E) must be submitted with the manuscript. Desirable
information (D) should be submitted if available. If using primers obtained from RTPrimerDB, information on qPCR target, oligonucleotides,
protocols and validation is available from that source.
*: Assessing the absence of DNA using a no RT assay is essential when first extracting RNA. Once the sample has been validated as
RDNA-free, inclusion of a no-RT control is desirable, but no longer essential.
**: Disclosure of the probe sequence is highly desirable and strongly encouraged. However, since not all commercial pre-designed assay
vendors provide this information, it cannot be an essential requirement. Use of such assays is advised against.
